# Supplementary material for: Nonfullerene acceptors based on extended fused rings flanked with benzothiadiazolylmethylenemalononitrile for polymer solar cells
Source: Royal Society of Chemistry journal article supplement (doi:10.1039/c5ta05901a), 2015-01-01
Supplement: c5ta05901a1.pdf [file c5ta05901a1.pdf]

Electronic Supplementary Information for:

**Nonfullerene acceptors based on extended fused rings flanked with  
benzothiadiazolymethylenemalononitrile for polymer solar cells**

Huitao Bai,<sup>§ab</sup> Yao Wu,<sup>§a</sup> Yifan Wang,<sup>bd</sup> Yang Wu,<sup>c</sup> Rong Li,<sup>a</sup> Pei Cheng,<sup>bd</sup> Mingyu Zhang,<sup>a</sup>  
Jiayu Wang,<sup>a</sup> Wei Ma<sup>c</sup> and Xiaowei Zhan<sup>\*a</sup>

*<sup>a</sup>Department of Materials Science and Engineering, College of Engineering, Key  
Laboratory of Polymer Chemistry and Physics of Ministry of Education, Peking  
University, Beijing, 100871, P. R. China. E-mail: xwzhan@pku.edu.cn*

*<sup>b</sup>Beijing National Laboratory for Molecular Sciences, Key Laboratory of Organic Solids,  
Institute of Chemistry, Chinese Academy of Sciences, Beijing, 100190, P. R. China*

*<sup>c</sup>State Key Laboratory for Mechanical Behavior of Materials, Xi'an Jiaotong University,  
Xi'an, 710049, P. R. China*

*<sup>d</sup>University of Chinese Academy of Sciences, Beijing, 100049, P. R. China*

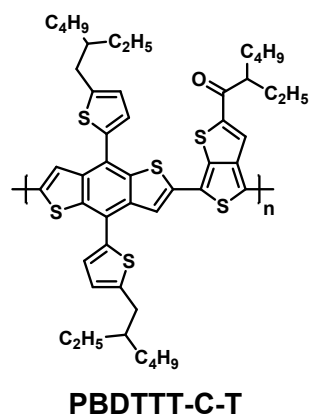

**Fig. S1** Chemical structure of PBDTTT-C-T.

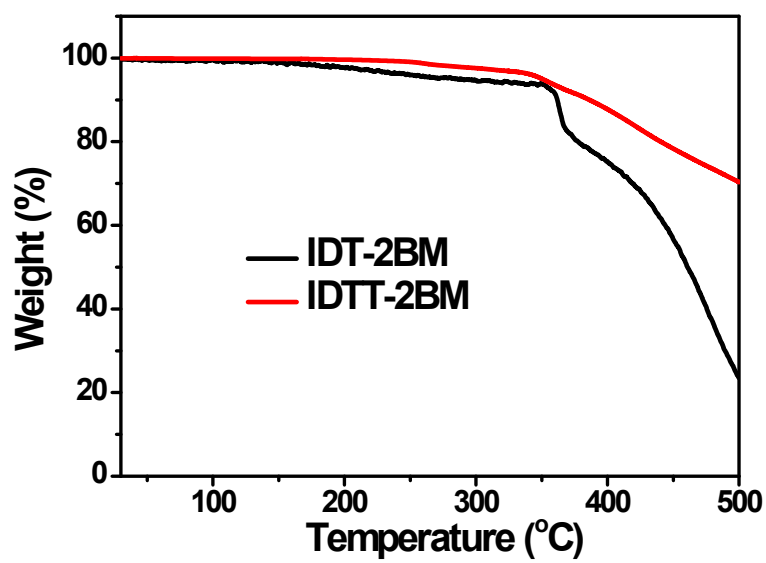

**Fig. S2** TGA curves of IDT-2BM and IDTT-2BM.

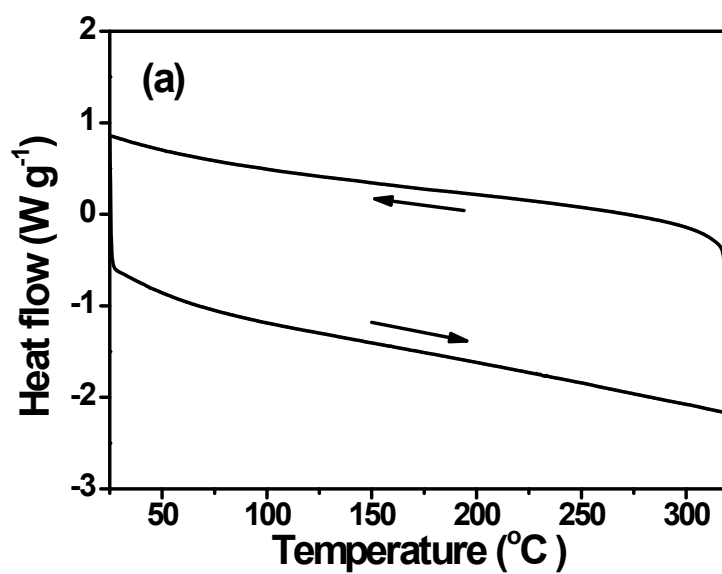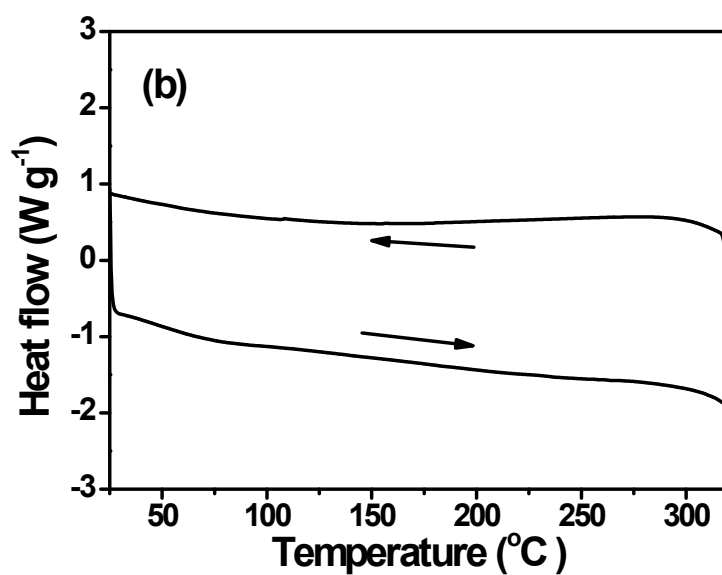

Fig. S3 DSC curves of (a) IDT-2BM and (b) IDTT-2BM.

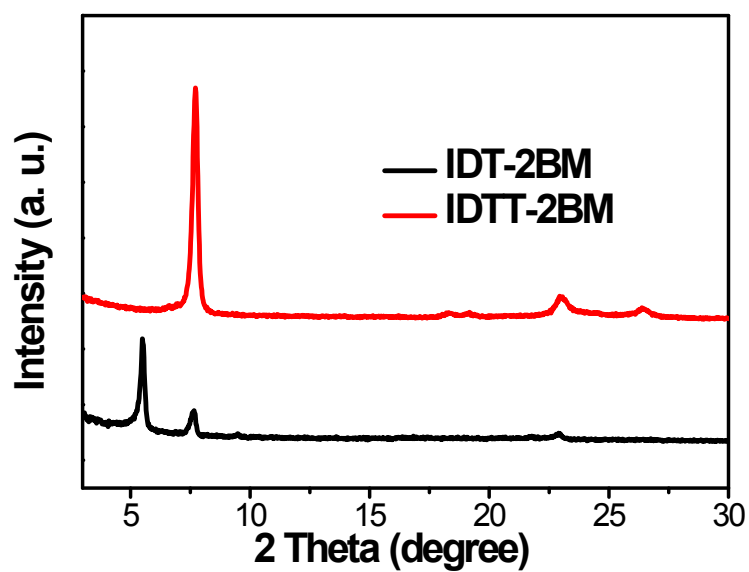

Fig. S4 XRD patterns of pristine IDT-2BM and IDTT-2BM films on SiO<sub>2</sub>/Si substrate.

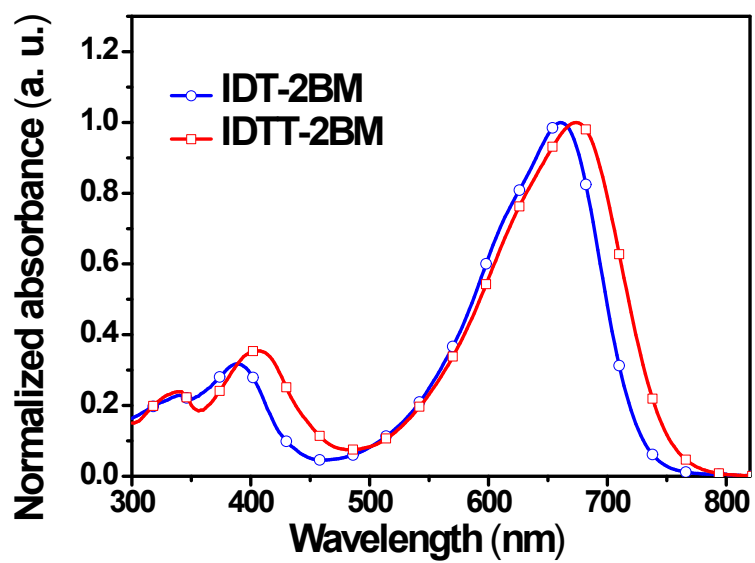

Fig. S5 Absorption spectra of IDT-2BM and IDTT-2BM in chloroform solution.

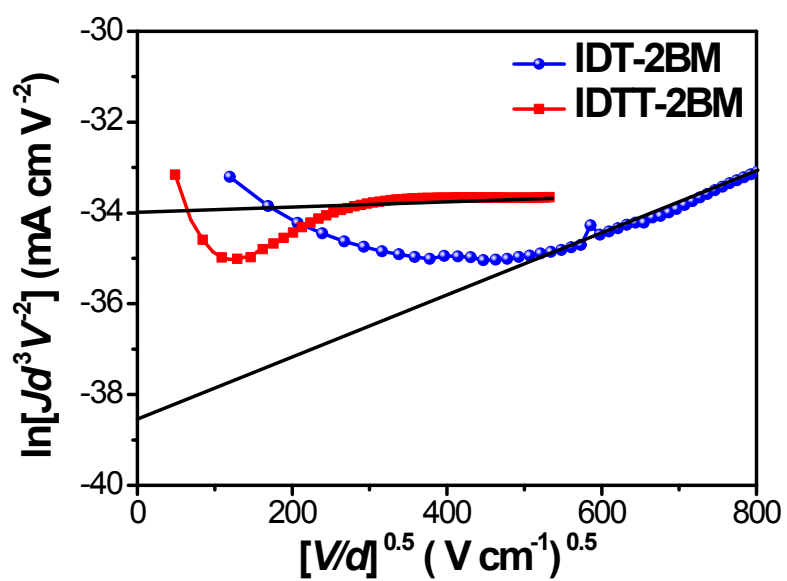

**Fig. S6**  $J$ - $V$  characteristics for electron-only devices based on pristine IDT-2BM and IDTT-2BM films.

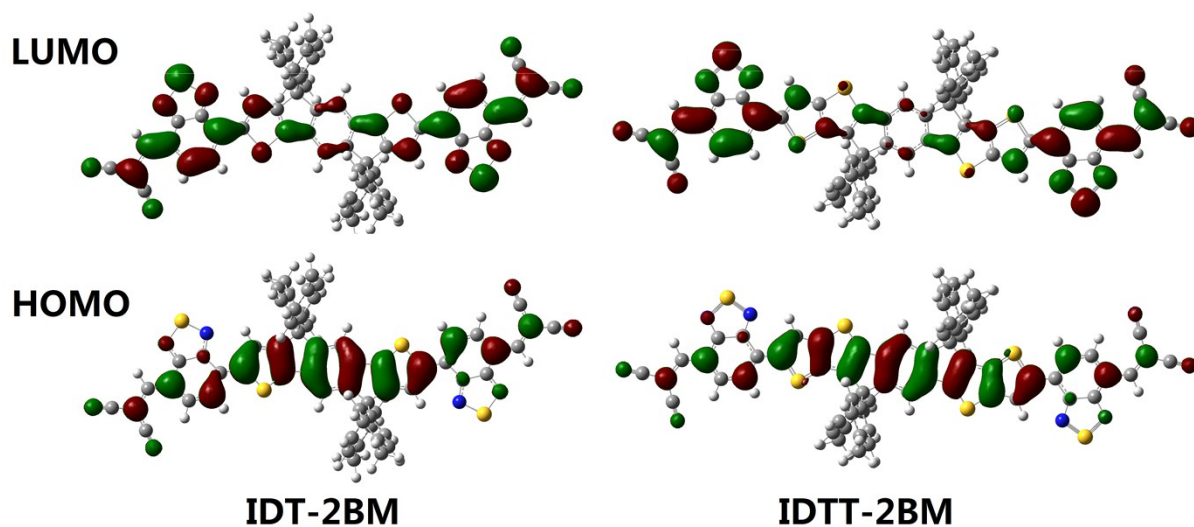

**Fig. S7** Theoretically calculated molecular orbitals of IDT-2BM and IDTT-2BM. The alkyl chains are replaced with methyl groups for computational simplicity.

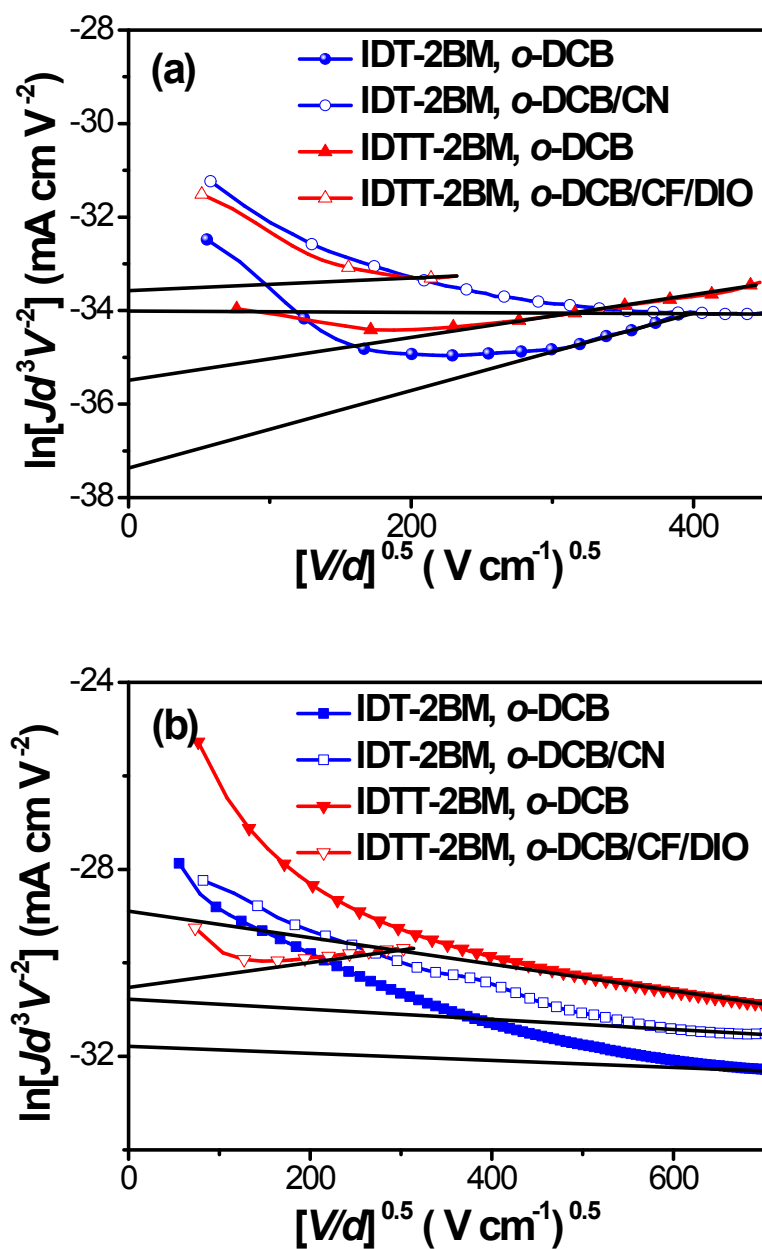

**Fig. S8**  $J$ - $V$  characteristics for (a) electron-only and (b) hole-only devices based on PBDTTT-C-T: IDT-2BM or IDTT-2BM (1.5: 1, w/w) blend films prepared with different conditions.

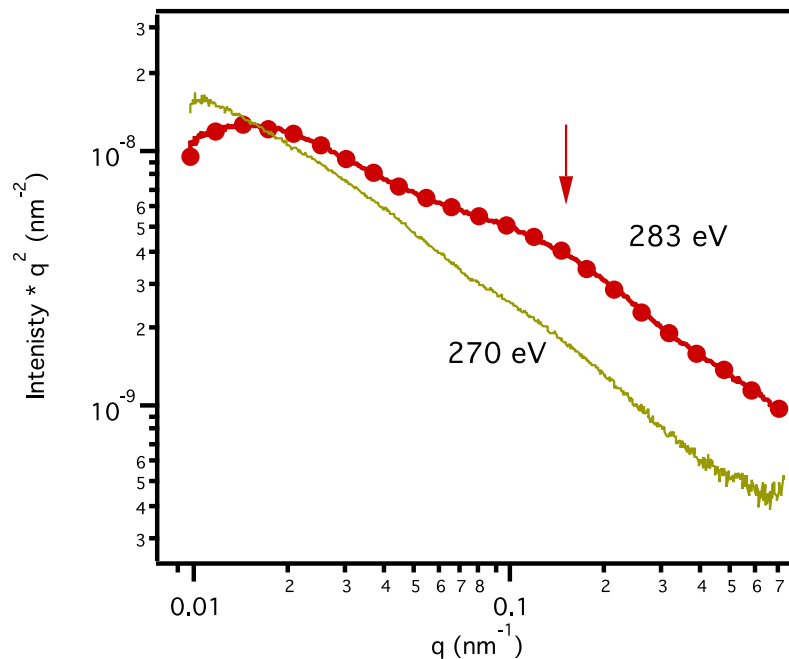

**Fig. S9** R-SoXS profiles of PBDTTT-C-T: IDTT-2BM processed with *o*-DCB/CF/DIO with the energy of 270 and 283 eV. Before the absorption edge 270 eV, the mass-contrast dominates the scattering. At 283 eV, the contrast between PBDTTT-C-T and IDTT-2BM is enhanced and the phase separation is detected with peak near  $q=0.1-0.2 \text{ nm}^{-1}$ .

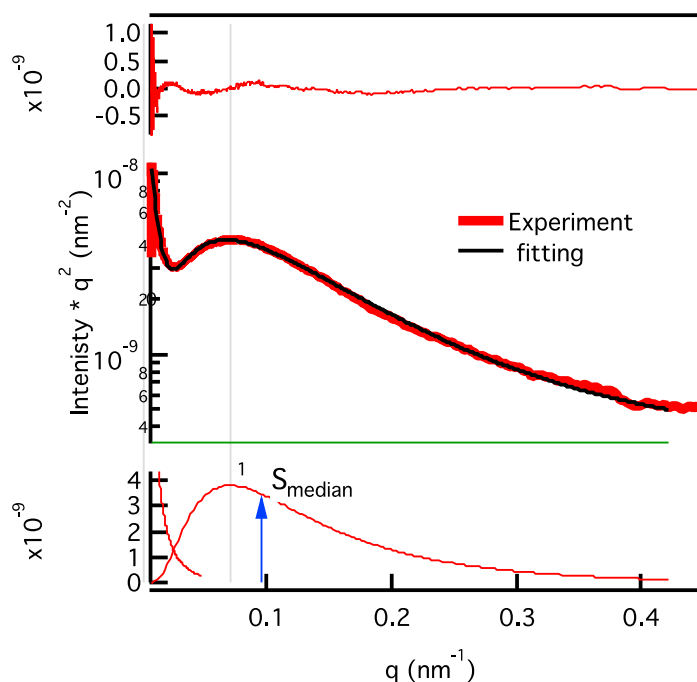

**Fig. S10** The fitting of the R-SoXS (PBDTTT-C-T: IDT-2BM processed with CN) with log-normal distribution.

**Table S1.** Photovoltaic parameters of the OSCs (processed with *o*-DCB solution) based on PBDTTT-C-T: acceptor with different weight ratios under the illumination of AM1.5G, 100 mW cm<sup>-2</sup>.

| acceptor | D/A ratio<br>(w/w) | $V_{oc}^a$<br>(V) | $J_{sc}^a$<br>(mA cm <sup>-2</sup> ) | FF <sup>a</sup><br>(%) | PCE <sup>a</sup><br>(%) |
|----------|--------------------|-------------------|--------------------------------------|------------------------|-------------------------|
| IDT-2BM  | 1: 1.5             | 0.765 ± 0.003     | 8.80 ± 0.15                          | 45.5 ± 0.4             | 3.07 ± 0.08             |
|          |                    | (0.769)           | (8.97)                               | (46.0)                 | (3.17)                  |
|          | 1: 1               | 0.764 ± 0.003     | 9.18 ± 0.17                          | 45.7 ± 0.4             | 3.29 ± 0.09             |
|          |                    | (0.768)           | (9.38)                               | (47.2)                 | (3.40)                  |
|          | 1.5: 1             | 0.762 ± 0.003     | 10.63 ± 0.18                         | 45.2 ± 0.4             | 3.67 ± 0.12             |
|          |                    | (0.766)           | (10.85)                              | (45.6)                 | (3.79)                  |
| IDTT-2BM | 2: 1               | 0.766 ± 0.004     | 7.86 ± 0.18                          | 31.4 ± 0.2             | 1.89 ± 0.07             |
|          |                    | (0.771)           | (8.08)                               | (31.6)                 | (1.97)                  |
|          | 1.5: 1             | 0.771 ± 0.002     | 6.92 ± 0.09                          | 38.1 ± 0.2             | 2.01 ± 0.06             |
|          |                    | (0.773)           | (7.03)                               | (38.5)                 | (2.09)                  |
|          | 1: 1               | 0.738 ± 0.006     | 4.77 ± 0.06                          | 33.9 ± 0.2             | 1.20 ± 0.03             |
|          |                    | (0.747)           | (4.83)                               | (34.1)                 | (1.23)                  |
|          | 1: 1.5             | 0.751 ± 0.005     | 3.77 ± 0.04                          | 34.5 ± 0.2             | 0.95 ± 0.04             |
|          |                    | (0.758)           | (3.82)                               | (34.5)                 | (1.00)                  |

<sup>a</sup> The performance of the best device is given in parentheses and the average PCE was obtained from over 20 devices.



**Table S2.** SCLC data of hole-only and electron-only devices based on PBDTTT-C-T: acceptor (1.5: 1, w/w) blended films.

| acceptor | solution                          | $\mu_h$ ( $\text{cm}^2 \text{V}^{-1} \text{s}^{-1}$ ) <sup>c</sup> | $\mu_e$ ( $\text{cm}^2 \text{V}^{-1} \text{s}^{-1}$ ) <sup>c</sup> | $\mu_h/\mu_e$ |
|----------|-----------------------------------|--------------------------------------------------------------------|--------------------------------------------------------------------|---------------|
| IDT-2BM  | <i>o</i> -DCB                     | $(8.3 \pm 0.4) \times 10^{-5}$                                     | $(5.0 \pm 0.2) \times 10^{-7}$                                     | 166           |
|          | <i>o</i> -DCB/CN <sup>a</sup>     | $(2.5 \pm 0.1) \times 10^{-4}$                                     | $(1.0 \pm 0.1) \times 10^{-5}$                                     | 25            |
| IDTT-2BM | <i>o</i> -DCB                     | $(1.7 \pm 0.1) \times 10^{-3}$                                     | $(2.8 \pm 0.1) \times 10^{-6}$                                     | 607           |
|          | <i>o</i> -DCB/CF/DIO <sup>b</sup> | $(4.1 \pm 0.2) \times 10^{-4}$                                     | $(1.3 \pm 0.1) \times 10^{-5}$                                     | 32            |

<sup>a</sup> *o*-DCB/CN = 100: 6 (v/v); <sup>b</sup> *o*-DCB/CF/DIO = 60: 40: 3 (v/v). <sup>c</sup> These mobilities were obtained from over 10 devices.
